# Supplementary material for: Salinity effect on the metabolic pathway and microbial function in phenanthrene degradation by a halophilic consortium
Source: PubMed Central journal article supplement (PMC5918149; doi:10.1186/s13568-018-0594-3), 2018-04-25
Supplement: 13568_2018_594_MOESM1_ESM.pdf [file 13568_2018_594_MOESM1_ESM.pdf]

*AMB Express*

**Additional Material**

**Salinity Effect on the Metabolic Pathway and Microbial Function in Phenanthrene Degradation by a Halophilic Consortium**

Chongyang Wang, Yong Huang, Zuotao Zhang, Hui Wang\*

State Key Joint Laboratory of Environment Simulation and Pollution Control;  
School of Environment, Tsinghua University, Beijing, 100084, China.

- \* Correspondence to Hui Wang: wanghui@tsinghua.edu.cn  
Tel: 86-10-62772137; Fax: 86-10-62771472;
- Chongyang Wang, 13051971091@163.com;
- Yong Huang, [hy791441103@yeah.net](mailto:hy791441103@yeah.net);
- Zuotao Zhang, [zhangzuotaoaxy@163.com](mailto:zhangzuotaoaxy@163.com).

Table S1. Accession numbers of the cloned catabolic gene sequences.

| number | protein | Sequences                            | Accession number |
|--------|---------|--------------------------------------|------------------|
| 1      | C12O    | C12O in <i>Halomonas</i> LB1         | MG827135         |
| 2      | C12O    | C12O in <i>Halomonas</i> LB12        | MG827136         |
| 3      | C12O    | C12O in <i>Halomonas</i> G29         | MG827137         |
| 4      | C12O    | C12O in <i>Halomonas</i> G31         | MG827138         |
| 5      | C12O    | C12O in <i>Halomonas</i> G34         | MG827139         |
| 6      | C12O    | C12O in <i>Marteella</i> N5          | MG827140         |
| 7      | C12O    | C12O in <i>Chromohalobacter</i> LB10 | MG827141         |
| 8      | C12O    | C12O in <i>Chromohalobacter</i> LB16 | MG827142         |
| 9      | C12O    | OTU <sub>C12O</sub> 1                | MG827143         |
| 10     | C12O    | OTU <sub>C12O</sub> 2                | MG827144         |
| 11     | C12O    | OTU <sub>C12O</sub> 3                | MG827145         |
| 12     | C12O    | OTU <sub>C12O</sub> 4                | MG827146         |
| 13     | C23O    | C23O in <i>Marinobacter</i> N1       | MG832594         |
| 14     | C23O    | C23O in <i>Marinobacter</i> N2       | MG832595         |
| 15     | C23O    | OTU <sub>C23O</sub> 1                | MG832596         |
| 16     | C23O    | OTU <sub>C23O</sub> 2                | MG832597         |
| 17     | P34O    | P34O in <i>Marteella</i> N5          | MG836548         |
| 18     | P34O    | P34O in <i>Halomonas</i> G29         | MG836549         |
| 19     | P34O    | P34O in <i>Halomonas</i> G31         | MG836550         |
| 20     | P34O    | OTU <sub>P34O</sub> 1                | MG832598         |
| 21     | P34O    | OTU <sub>P34O</sub> 2                | MG832599         |
| 22     | P34O    | OTU <sub>P34O</sub> 3                | MG832600         |
| 23     | P34O    | OTU <sub>P34O</sub> 4                | MG832601         |
| 24     | G12O    | G12O in <i>Halomonas</i> G29         | MG836239         |
| 25     | G12O    | G12O in <i>Thalassospira</i> G41     | MG836240         |
| 26     | G12O    | G12O in <i>Thalassospira</i> G42     | MG836241         |
| 27     | G12O    | OTU <sub>G12O</sub> 1                | MG836242         |
| 28     | G12O    | OTU <sub>G12O</sub> 2                | MG836243         |
| 29     | RHD     | RHD in <i>Marinobacter</i> N1        | MG836244         |
| 30     | RHD     | RHD in <i>Marinobacter</i> N2        | MG836245         |
| 31     | RHD     | RHD in <i>Marinobacter</i> N4        | MG836246         |
| 32     | RHD     | RHD in <i>Marteella</i> N5           | MG836247         |
| 33     | RHD     | OTU <sub>RHD</sub> 1                 | MG836248         |

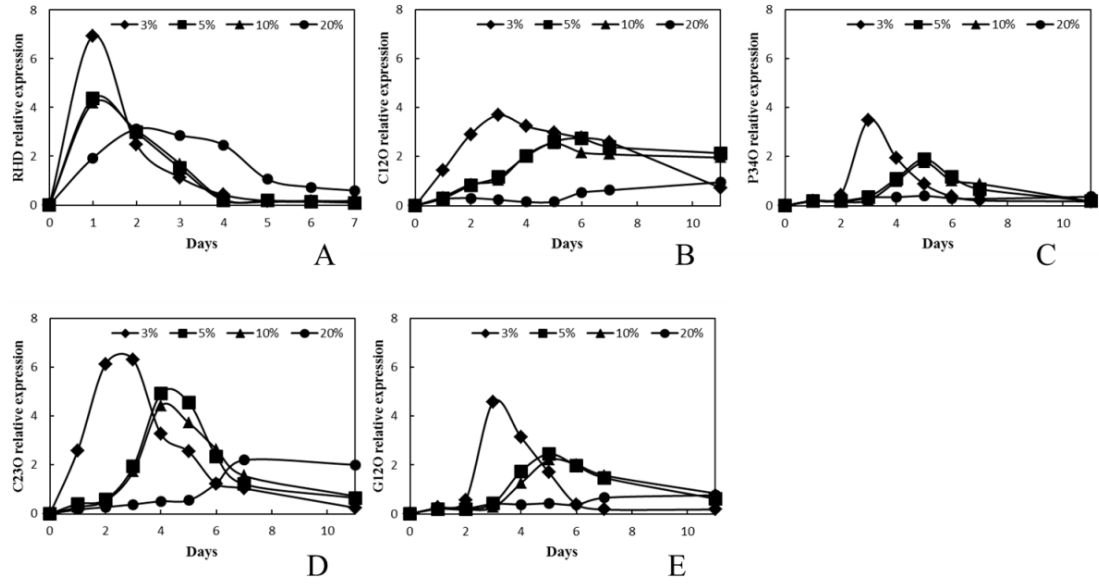

Figure S1. Relative expression levels of genes encoding RHD, C12O, C23O, P34O, and G12O during phenanthrene degradation under different salinity. The transcript/gene ratios were calculated for the microcosm incubation. Three independent experiments were performed (error bars are not shown). A: Relative expression of genes encoding RHD; B: Relative expression of genes encoding C12O; C: Relative expression of genes encoding P34O; D: Relative expression of genes encoding C23O; E: Relative expression of genes encoding G12O.
